# Supplementary material for: Antioxidant and physiological effects of Si-Wu-Tang on skin and liver: a randomized, double-blind, placebo-controlled clinical trial
Source: PubMed Central journal article supplement (PMC4929740; doi:10.1186/s13020-016-0102-0), 2016-06-30
Supplement: 13020_2016_102_MOESM1_ESM.pdf [file 13020_2016_102_MOESM1_ESM.pdf]

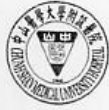

# 中山醫學大學附設醫院人體試驗委員會

Institutional Review Board  
Chung Shan Medical University Hospital  
No.110, Sec.1, Chien-Kuo N. Road, Taichung, Taiwan 402  
Phone: 04-24739595 Fax: 04-23248199

## 臨床試驗計畫許可書

CSMUH No:CS08008

計畫名稱：漢方滋補飲延緩衰老功能之研究

計畫編號：

計畫主持人：王進崑（中山醫學大學副校長）

版本：【Protocol: Version: 2.0, Date:3-Mar-2008 ; Informed Consent Form: Version: 3.0,  
Date:01-Apr-2008 ; AD : Version: 2.0, Date:03-Mar-2008】

同意函有效期：98年4月13日

上述計畫已於97年3月20日經本院人體試驗委員會九十七年度第三次會議決議修正後同意，於97年4月14日准予執行。

有關計畫主持人的職責、義務、及注意事項均詳列於背面，請參閱並遵守。

主任委員 韓志平

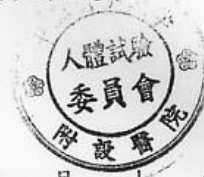

中華民國九十七年四月十四日

### Permission of Clinical Trial Chung Shan Medical University Hospital

Date: Apr 14, 2008

Protocol Title: Study on the antiaging effect of Chinese herb drink

Protocol No:

Principle Investigator: Chin-Kun Wang

Version: 【Protocol: Version: 2.0, Date:3-Mar-2008 ; Informed Consent Form: Version: 3.0,  
Date:01-Apr-2008 ; AD : Version: 2.0, Date:03-Mar-2008】

Above study has been approved by Institutional Review Board of the Chung Shan Medical University Hospital on 14-Apr-2008 and valid through 13-Apr-2009.

About the essential duties, obligations and responsibilities of the principal investigator please refer to the back page.

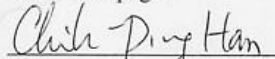

Chih-Ping Han, MD/PhD

Chairman

Institutional Review Board

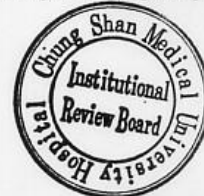

附錄二

個人基本資料

姓名：\_\_\_\_\_ 性別： 男生  女生

年齡：

身高：

體脂肪：

體重：

BMI：

目前用藥記錄：

抽煙： 沒有  有

口服避孕藥： 沒有  有

平日是否有服用藥物的習慣： 沒有  有

您有吃營養補充劑的習慣： 沒有  有

最近一週內是否有感冒或生病而用藥： 沒有  有

家族史： 高血脂症  糖尿病  其他\_\_\_\_\_

腹部超音波檢查結果：

醫師診察： 正常  其他

醫師簽名：\_\_\_\_\_
